# Supplementary material
Source: Springer Nature journal article supplement (http://www.springermedizin.de/resource/supplementary/13023_2012_540_MOESM6_ESM.pdf/9642698)

# HHD-Score (N): Absolute Change (post-prä)

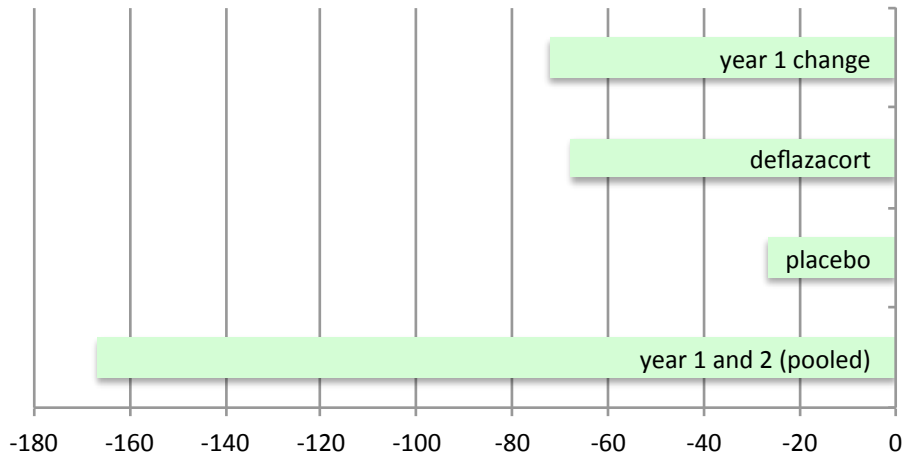

Supplement: MOESM6 [file 9642698]
